# Supplementary material for: A Novel Platform for the Potentiation of Therapeutic Antibodies Based on Antigen-Dependent Formation of IgG Hexamers at the Cell Surface
Source: PLoS Biol. 2016 Jan 6;14(1):e1002344. doi: 10.1371/journal.pbio.1002344 (PMC4703389; doi:10.1371/journal.pbio.1002344)
Supplement: S1 Data — (XLSX) [file pbio.1002344.s001.xlsx]

## Sheet: Figure 1A
Figure 1A. CDC by αCD20 antibody variants.
CDC of Wien 133 cells (left panel)
	Lysis (%)
[IgG] (µg/mL)	11B8	11B8-E345R	RTX	RTX-E354R
10	3.6	96.5	80.4	97.9
3	2.9	93.9	69.1	97
1	2.8	85.8	50.4	91.2
0.3	2.6	56.5	21.7	72.5
0.1	2.6	36.2	5.4	37.8
0.03	2.3	5.6	2.2	10.1
0.01	2.3	2.7	2.1	2.9
0.003	2.4	2.2	2.1	2.3
0.001	2.1	2.1	2.2	6.2
CDC of Daudi cells (right panel)
	Lysis (%)
[IgG] (µg/mL)	11B8	11B8-E345R	RTX	RTX-E354R
10	10.8	98	80.5	98
3	9.8	95.9	57.6	96.5
1	9.1	79.3	20.8	96
0.3	8.3	27.9	12	75.4
0.1	9.2	9.9	9.4	27.6
0.03	7.6	10	8.6	11.3
0.01	8.6	9.1	7.7	9.3
0.003	8	10.4	8.9	9.4
0.001	12.4	8.5	10.4	8.2

## Sheet: Figure 1B
Figure 1B. CDC by αCD52 antibody variants.
CDC of Wien 133 cells (left panel)
	Lysis (%)
[IgG] (µg/mL)	ALM	E345R
30	85.3	88.1
10	86.2	92.1
3	78.9	93
1	45.6	92.2
0.3	25.3	92.5
0.1	19.7	86.6
0.03	22.5	49
0.01	26.2	25
0.003	24.9	22.4
0.001	23.5	22.2
0.0003	26.9	17.6
CDC of Raji cells (right panel)
	Lysis (%)
[IgG] (µg/mL)	ALM	E345R
30	23.3	69.9
10	22.1	66.5
3	15.2	68.1
1	14.3	58.8
0.3	13.8	42.5
0.1	14.6	18.5
0.03	15.2	15.8
0.01	14.8	15.9
0.003	16.1	17.3
0.001	15.4	15.1
0.0003	14.3	17.3

## Sheet: Figure 1C
Figure 1C. CDC by αCD38 antibody variants.
CDC of Wien 133 cells (left panel)
	Lysis (%)
[IgG] (µg/mL)	005	005-E345R	003	003-E345R
3	3.9	81	2.6	79.6
1	3.8	84.6	2.4	60.8
0.3	3.6	80.4	2.8	54.4
0.1	3.5	68.9	3	21.6
0.03	3.8	54.6	2.4	5.7
0.01	3.6	17.7	2.6	2.3
0.003	2.9	6.9	2.5	2.7
0.001	2.8	3.9	2.5	3
CDC of Daudi cells (right panel)
	Lysis (%)
[IgG] (µg/mL)	005	005-E345R	003	003-E345R
10	86.9	98.8	6.3
3	91.6	98.6	5.4	98.9
1	90.4	98.1	6.3	98.3
0.3	88	98.7	6.2	97.6
0.1	23.1	98.6	5.6	67.4
0.03	6.2	96.1	5.9	9.7
0.01	5.1	72.5	5.9	4.9
0.003	5.2	21.7	5.6	5.1
0.001	6	5.9	5.3	5.6

## Sheet: Figure 1D
Figure 1D. CDC by αEGFR antibody variants.
CDC of A431 cells
	Lysis (%)
[IgG] (µg/mL)	2F8	E345R
10	16.7	88.2
3	18.1	88.8
1	16.6	87
0.3	18.9	79
0.1	18.9	44.1
0.03	16.8	17.2
0.01	15.8	16

## Sheet: Figure 2A
Figure 2A. CDC by αCD20 antibodies
	Lysis (%)			Lysis (%)
	Ritux			E345R
Cell Line	replicate 1	replicate 2	replicate 3	replicate 1	replicate 2	replicate 3
ARH-77	1.269	4.809	8.3	30.616	54.325	28.2
Daudi	61.38	78.42	72.3	78.77	85.55	99.1
DOHH-2	15.589	29.289	38.2	68.155	67.33	93.5
MEC-2	0	10.275	12.2	2.9	23.607	17.7
SU-DHL-4	61.743	58.097	74	77.56	77.964	88
WIL2-S	70.62	79.721	84.4	95.294	95.636	96
WSU-NHL	7.927	9.76	24.6	59.472	53.25	51.1

## Sheet: Figure 2B
Figure 2B: Mouse tumor xenograft model
Left panel: average tumor volume (mm3)
	7D8-E354R									7D8-K322A									7D8									b12
Time (days)	mouse 1	2	3	4	5	6	7	8	9	mouse 1	2	3	4	5	6	7	8	9	mouse 1	2	3	4	5	6	7	8	9	mouse 1	2	3	4	5	6	7	8	9
5	44	41	54	46	62	54	70	77	65	35	35	57	47	72	77	61	103	69	56	84	29	75*	77	68	45	54	48	46	55	58	67	22	51	74	66	46
8	77	65	101	92	82	38	115	123	60	77	39	58	69	82	127	115	91	101	76	113	57	102*	129	70	42	83	91	86	109	71	42	53	87	105	149	75
12	125	86	116	75	166	42	135	183	60	75	33	160	127	136	190	61	341	208	118	152	80	257*	308	91	37	135	127	138	184	165	69	87	174	86	315	172
15	192	55	194	102	226	63	141	196	86	122	67	238	142	184	303	67	537	288	159	248	99	466*	363	160	18	189	155	209	261	223	112	159	225	33	460	372
19	189	48	167	91	249	25	125	236	113	155	109	350	267	323	425	52	890	432	168	324	282	575*	553	176	0	335	173	397	415	356	165	381	458	0	588	693
22	231	0	168	123	364	14	157	231	155	200	110	473	323	368	582	22	1163	504	172	343	311	775*	688	268	0	403	261	646	580	379	239	395	533	0	759	903
26	267	29	262	164	564	0	235	274	245	392*	173*	927*	632*	574*	807*	0*		848*	266*	723*	603*		1169*	318*	0*	610*	319*	890*	1002*	757*	413*	1758*	795*	0*	1232*
29	566	13	551	233	894	22	314	362	348	616*	390*	1239*	808*	907*	1146*	0*			375*	1177*	930*			486*	0*	893*	421*				781*		1181*	0*
33	667*	24*	990*	285*		20*	381*	457*	614*	868*	348*					0*			526*					987*	0*		588*							0*
36		0*		291*		34*	488*	680*	939*		527*					0*			754*						0*		901*							0*
40		0*		447*		34*	767*				806*					0*			962*						0*									0*
* Values excluded because some of the mice in that group had to be taken out from the study.
** Values excluded because the PK analysis demonstrated failed IgG administration
Right panel: tumor progression <700 mm3 (%)
Time (days)	7D8-E345R	7D8-K322A	7D8	b12
0	100	100	100	100
17.3877		88.8889
19.8622				88.8889
20.4548				77.7778
21.3311			87.5
22.8493				66.6667
23.2				55.5556
23.7147				44.4444
24.1459		77.7778
24.2916		66.6667
24.3074		55.5556
24.3527				33.3333
25.4285			75
25.6538				22.2222
26.8853			62.5
27.0233		44.4444
27.0246			50
27.2018	88.8889
27.576		33.3333
28.525				11.1111
30.7207			37.5
30.7297	77.7778
30.9443		22.2222
33.3506	66.6667
33.8618	55.5556
33.8684			25
36.0402			12.5
38.0033	44.4444
38.6685		11.1111
39.503	33.3333
47.3893	33.3333
50	33.3333	11.1111	12.5	11.1111

## Sheet: Figure 3B
Figure 3B: CDC of Daudi cells by αCD38 antibodies
Results are described in detail in S4 Table.

## Sheet: Figure 3C
Figure 3C: CDC of Wien 133 cells by αCD38 antibodies
Results are described in detail in S5 Table.

## Sheet: Figure 3D
Figure 3D. Dose response in CDC of Wien 133 cells by IgG1-005 and selected mutants
	Lysis (%)
[IgG] (µg/mL)	b12	IgG1-005	P247G	E345K	E345R	E430G	E430T	S440Y
10	21	21	92.5	96.3	97.3	95.7	97.7	97.4
3	21.3	24.8	93.4	95.7	97.4	96.2	98	96.1
1	21.2	23.9	93.2	96	97.6	95.6	96.8	95
0.3	20.8	23.6	92.4	96.9	96.6	96.3	98.1	95.3
0.1	21.1	19.6	82.7	95.2	97.6	94.9	97.5	88.4
0.03	20	19.8	35.1	77.1	90.5	75.5	84.3	49.6
0.01	19.7	20.2	26	31.3	50.3	37.7	41.4	29.5
0.003	18.9	19.6	22.6	25.9	25.9	24.5	25.9	23.5
0.001			23.4	23.1	23.7	23.3	20.9	21.6
0.0003			23.7	22	24.7	20.8	20.7	23.9

## Sheet: Figure 3E
Figure 3E. Dose response in CDC of Ramos cells by RTX and selected mutants
	Lysis (%)
[IgG] (µg/mL)	b12	RTX	E345K	E345R	E430G	E430T	S440Y
30	8.1	48.5	80.2	81.2	86.1	83.9	87.8
10	8.5	45	81	83.9	85.9	85.4	82.9
3	7.1	40.8	85.5	86.8	81	80.7	79.6
1	7.4	37.4	67.9	82.3	76.2	78.8	67.2
0.3	8	29.1	44.9	59.8	48.6	54.7	42.1
0.1	6.3	11.7	36.3	43.8	33.9	33.6	28.5
0.03	6.7	7.9	16.6	24.3	14.3	17.7	11.8
0.01		7.5	8.5	11	7.1	7.9	6.6
0.003		7.4	7.3	6.6	7.7	6.7	6.6
0.001		8.5	6.6	6.8	6.6	7	5.9
0.0003		7		8.4	6.9	7.1	6

[truncated: 20 more sheets: Figure 4A, Figure 4B, Figure 5B, Figure 5C, Figure 5D, Figure 6A, Figure 6B, Figure 6C, Figure 7, S2 Figure A, S2 Figure B, S3 Figure, S4 Figure B, S5 Figure A, S5 Figure B, S5 Figure C, S5 Figure D, S5 Figure E, S5 Figure F, S5 Figure G]
